# Supplementary material for: Antibacterial and Anti-Biofilm Activity of Pyrones from a Pseudomonas mosselii Strain
Source: MDPI journal article supplement (doi:10.3390/antibiotics11111655), 2022-11-18
Supplement: s1 [file s1]

# Supporting Information

Antibacterial and anti-biofilm activity of pyrones from a *Pseudomonas mosselii* strain

Xueling Liu\*, Yali Wang, Diana A. Zaleta-Pinet, Robert P. Borris, Benjamin R. Clark\*

## Contents

|                                                                                                                      |    |
|----------------------------------------------------------------------------------------------------------------------|----|
| Structure elucidation of compounds <b>1-6</b> .....                                                                  | 2  |
| Figure S1 HRESIMS spectrum of known compound <b>1</b> .....                                                          | 4  |
| Figure S2 <sup>1</sup> H-NMR spectrum of known compound <b>1</b> (Methanol- <i>d</i> <sub>4</sub> , 600 MHz) .....   | 4  |
| Figure S3 <sup>13</sup> C-NMR spectrum of known compound <b>1</b> (Methanol- <i>d</i> <sub>4</sub> , 150 MHz) .....  | 5  |
| Figure S4 HRESIMS spectrum of known compound <b>2</b> .....                                                          | 5  |
| Figure S5 <sup>1</sup> H-NMR spectrum of known compound <b>2</b> (CDCl <sub>3</sub> , 600 MHz) .....                 | 6  |
| Figure S6 <sup>13</sup> C-NMR spectrum of known compound <b>2</b> (CDCl <sub>3</sub> , 150 MHz) .....                | 6  |
| Figure S7 HRESIMS spectrum of known compound <b>3</b> .....                                                          | 7  |
| Figure S8 <sup>1</sup> H-NMR spectrum of known compound <b>3</b> (Methanol- <i>d</i> <sub>4</sub> , 600 MHz) .....   | 7  |
| Figure S9 <sup>13</sup> C-NMR spectrum of known compound <b>3</b> (Methanol- <i>d</i> <sub>4</sub> , 150 MHz) .....  | 8  |
| Figure S10 HRESIMS spectrum of known compound <b>4</b> .....                                                         | 8  |
| Figure S11 <sup>1</sup> H-NMR spectrum of known compound <b>4</b> (Methanol- <i>d</i> <sub>4</sub> , 600 MHz).....   | 9  |
| Figure S12 <sup>13</sup> C-NMR spectrum of known compound <b>4</b> (Methanol- <i>d</i> <sub>4</sub> , 150 MHz) ..... | 9  |
| Figure S13 HRESIMS spectrum of known compound <b>5</b> .....                                                         | 10 |
| Figure S14 <sup>1</sup> H-NMR spectrum of known compound <b>5</b> (Methanol- <i>d</i> <sub>4</sub> , 600 MHz).....   | 10 |
| Figure S15 <sup>13</sup> C-NMR spectrum of known compound <b>5</b> (Methanol- <i>d</i> <sub>4</sub> , 150 MHz) ..... | 11 |
| Figure S16 HRESIMS spectrum of known compound <b>6</b> .....                                                         | 11 |
| Figure S17 <sup>1</sup> H-NMR spectrum of known compound <b>6</b> (CDCl <sub>3</sub> , 600 MHz).....                 | 12 |
| Figure S18 <sup>13</sup> C-NMR spectrum of known compound <b>6</b> (CDCl <sub>3</sub> , 150 MHz) .....               | 12 |
| Figure S19 Antimicrobial assay of methanolic extract of <i>P. mosselii</i> P33 .....                                 | 13 |
| Figure S20 Phylogenetic tree of <i>P. mosselii</i> P33 .....                                                         | 14 |

Structure elucidation of compounds **1-6**.

Table S1 <sup>1</sup>H (600 MHz) and <sup>13</sup>C NMR (150 MHz) data for pseudopyronine A, B and C with *J* values (in Hertz) in parentheses.

| Position | Pseudopyronine A <sup>a</sup> |       | Pseudopyronine B <sup>b</sup> |       | Pseudopyronine C <sup>a</sup> |       |
|----------|-------------------------------|-------|-------------------------------|-------|-------------------------------|-------|
|          | H                             | C     | H                             | C     | H                             | C     |
| 1        |                               | 169.5 |                               | 167.8 |                               | 169.0 |
| 2        |                               | 103.6 |                               | 103.4 |                               | 103.8 |
| 3        |                               | 169.1 |                               | 166.3 |                               | 168.9 |
| 4        | 5.93 (1H, s)                  | 101.1 | 6.12 (1H, s)                  | 100.5 | 5.95 (1H, s)                  | 101.7 |
| 5        |                               | 164.9 |                               | 163.7 |                               | 164.9 |
| 1'       | 2.36 (2H, t, 7.5)             | 23.9  | 2.43 (2H, m)                  | 23.1  | 2.36 (2H, t, 7.8)             | 23.9  |
| 2'       | 1.44 (2H, m)                  | 29.1  | 1.50 (2H, m)                  | 28.1  | 1.44 (2H, m)                  | 29.1  |
| 3'       | 1.32 (2H, o)                  | 30.3  | 1.30 (2H, o)                  | 29.4  | 1.33 (2H, o)                  | 30.2  |
| 4'       | 1.31 (2H, o)                  | 33.0  | 1.30 (2H, o)                  | 31.7  | 1.31 (2H, o)                  | 32.9  |
| 5'       | 1.31 (2H, o)                  | 23.7  | 1.30 (2H, o)                  | 22.6  | 1.31 (2H, o)                  | 23.7  |
| 6'       | 0.89 (3H, t, 6.9)             | 14.4  | 0.87 (3H, o)                  | 14.1  | 0.89 (3H, o)                  | 14.4  |
| 1''      | 2.44 (2H, t, 7.5)             | 34.3  | 2.44 (2H, m)                  | 33.5  | 2.44 (2H, t, 7.5)             | 34.3  |
| 2''      | 1.64 (2H, m)                  | 27.6  | 1.62 (2H, m)                  | 26.8  | 1.63 (2H, m)                  | 27.9  |
| 3''      | 1.34 (2H, o)                  | 32.2  | 1.30 (2H, o)                  | 29.0  | 1.35 (2H, o)                  | 30.0  |
| 4''      | 1.35 (2H, o)                  | 23.4  | 1.30 (2H, o)                  | 31.8  | 1.31 (2H, o)                  | 33.0  |
| 5''      | 0.91 (3H, t, 6.8)             | 14.2  | 1.30 (2H, o)                  | 22.7  | 1.31 (2H, o)                  | 30.5  |
| 6''      |                               |       | 0.87 (3H, o)                  | 14.1  | 1.31 (2H, o)                  | 30.4  |
| 7''      |                               |       |                               |       | 1.31 (2H, o)                  | 32.9  |
| 8''      |                               |       |                               |       | 1.31 (2H, o)                  | 23.7  |
| 9''      |                               |       |                               |       | 0.89 (3H, o)                  | 14.4  |

<sup>a</sup>- in methanol-*d*<sub>4</sub>; <sup>b</sup>- in CDCl<sub>3</sub>; o-overlapped

Compounds **1**, **2** and **3** were obtained as white, amorphous powders. They all shared similar UV-vis spectra with maximum absorptions at 293 nm, characteristic of an α-pyrone

skeleton[21]. Compound **1** was isolated as a white solid. The molecular formula was determined to be  $C_{16}H_{26}O_3$  based on the observation of an  $[M + H]^+$  quasi-molecular ion at  $m/z$  267.1958 (calcd. for  $C_{16}H_{27}O_3$ , 267.1955) in the HR-ESI-orbitrap mass spectrum, the NMR data agreed with previous report. Therefore, compound **1** was identified as pseudopyronine A[21]. Compound **2** and **3** possessed similar NMR spectra to compound **1**, differing only in the length of the alkyl chains; they were identified as pseudopyronines B and C, respectively[21–23].

The molecular formula for compound **2** was determined to be  $C_{18}H_{30}O_3$  based on the observation of an  $[M + H]^+$  quasi-molecular ion at  $m/z$  295.2270 (calcd. for  $C_{18}H_{31}O_3$ , 295.2268) in the HR-ESI-orbitrap mass spectrum.  $^1H$  NMR data revealed the presence of two linear alkyl chains, and a single aromatic proton. In combination with the  $^{13}C$ -NMR and DEPT spectra, compound **2** included two methyl groups, eleven methylene groups and one methine. In the HMBC spectrum, correlations from H-1' ( $\delta$  2.43) to C-1 ( $\delta$  167.8), C-3 ( $\delta$  166.3) and correlations from H-1'' ( $\delta$  2.44) to C-4 ( $\delta$  100.5) confirmed that two alkyl chains were located at C-2 and C-5 of the  $\alpha$ -pyrone moiety, respectively. All of the individual protons and carbons (Table S1) were assigned by a combined analysis of 1D and 2D NMR analysis; this was sufficient to identify the compound as pseudopyronine B[23].

Compound **3** was isolated as a white amorphous powder. The molecular formula was determined as  $C_{20}H_{34}O_3$  based on the observation of an  $[M + H]^+$  quasi-molecular ion at  $m/z$  323.2576 (calcd. for  $C_{20}H_{35}O_3$ , 323.2581) in the HRESIMS spectrum. All of the individual protons and carbons (Table S1) were assigned by a combined analysis of 1D and 2D NMR. According to the spectral features and the same UV absorption suggested that compound **3** possessed the same  $\alpha$ -pyrone moiety with two fatty acid chain substituents. Comparing the molecular weight of compound **2** and **3**, suggested that compound **3** contained two more methylene groups. In the HMBC spectrum, correlations from H-1' ( $\delta$  2.36) to C-1 ( $\delta$  169.0), C-3 ( $\delta$  168.9) and correlations from H-1'' ( $\delta$  2.44) to C-4 ( $\delta$  101.7) confirmed that two alkyl chains were located at C-2 and C-5 of the  $\alpha$ -pyrone moiety, respectively. The two side chains were assigned by the NOESY and HSQC-TOCSY spectrum, individually. Thus, compound **3** was determined to be pseudopyronine C[22].

Compound **4** was isolated as a white, amorphous powder and identified as labradorin 1 based on the NMR data, X-ray and HRESIMS data. Compound **5** was obtained as a white solid, and determined to be labradorin 2 by comparing the HRESIMS and NMR data with previous report[24], similarly, compound **6** was identified as pimprinaaphine[25].

Figure S1 HRESIMS spectrum of known compound **1**

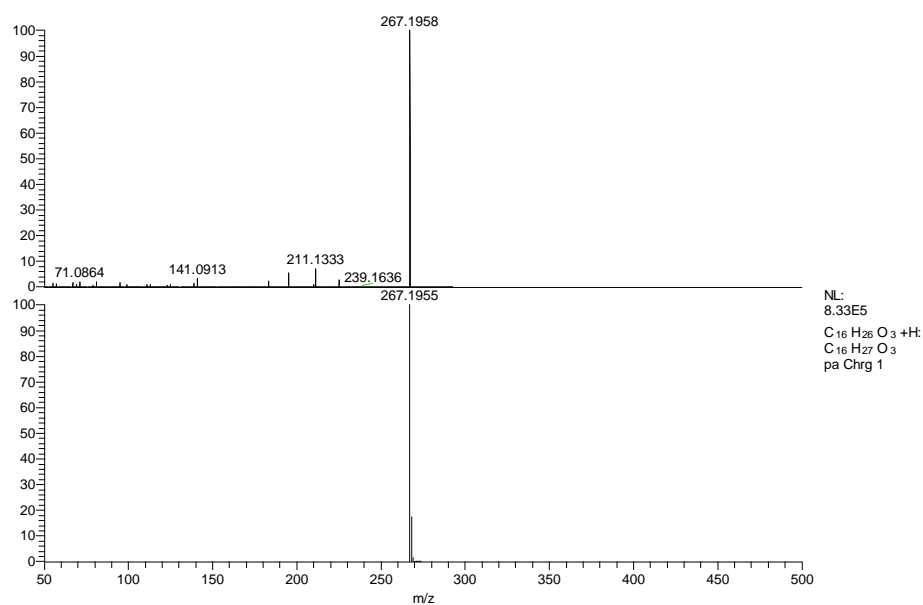

Figure S2 <sup>1</sup>H-NMR spectrum of known compound **1** (Methanol-*d*<sub>4</sub>, 600 MHz)

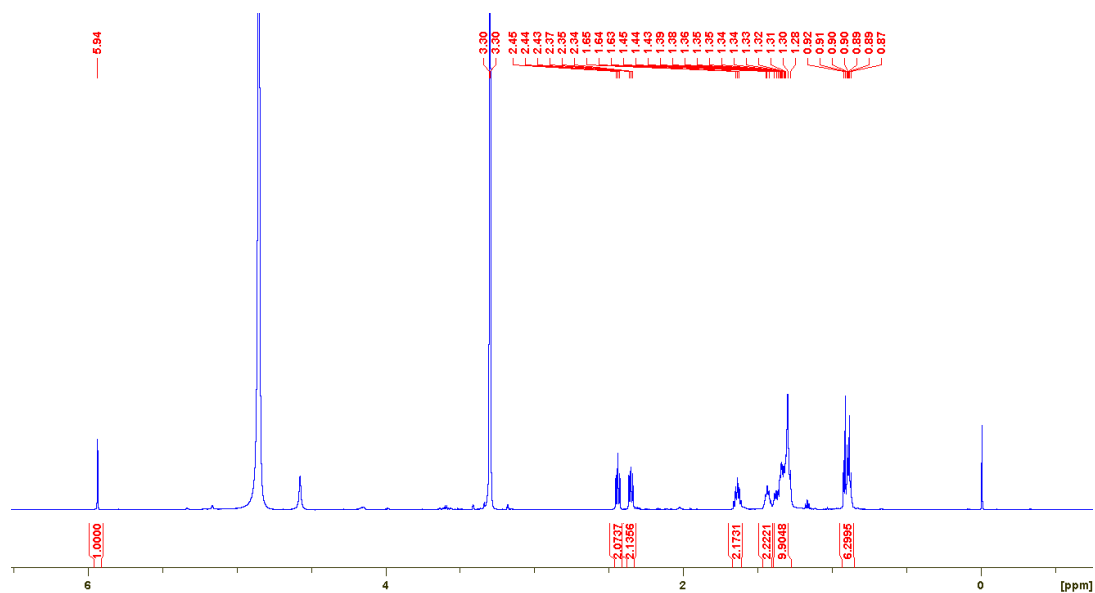

Figure S3  $^{13}\text{C}$ -NMR spectrum of known compound **1** (Methanol- $d_4$ , 150 MHz)

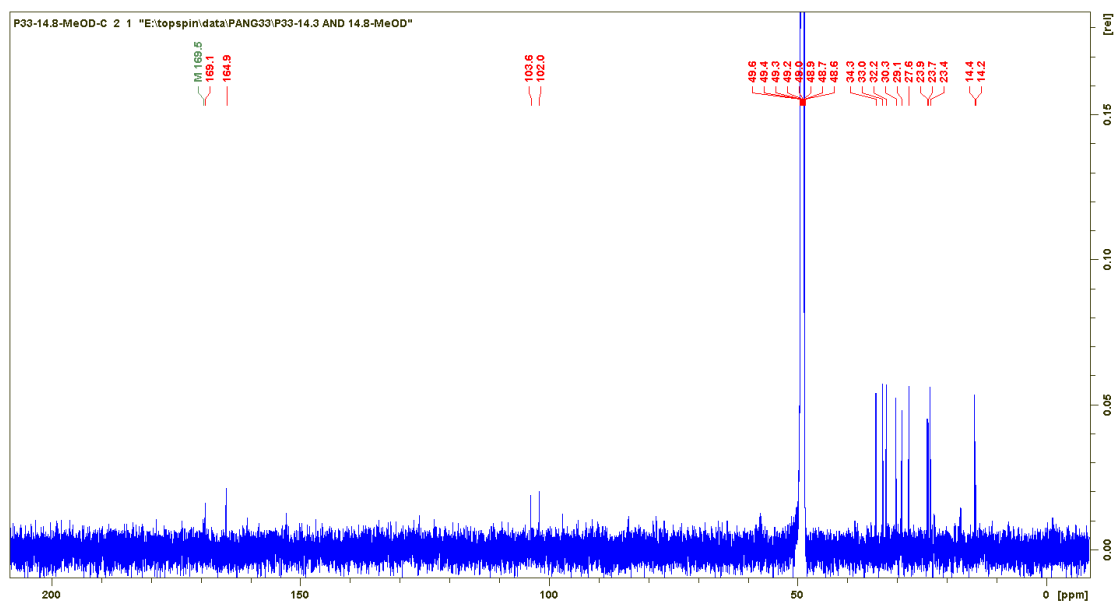

Figure S4 HRESIMS spectrum of known compound **2**

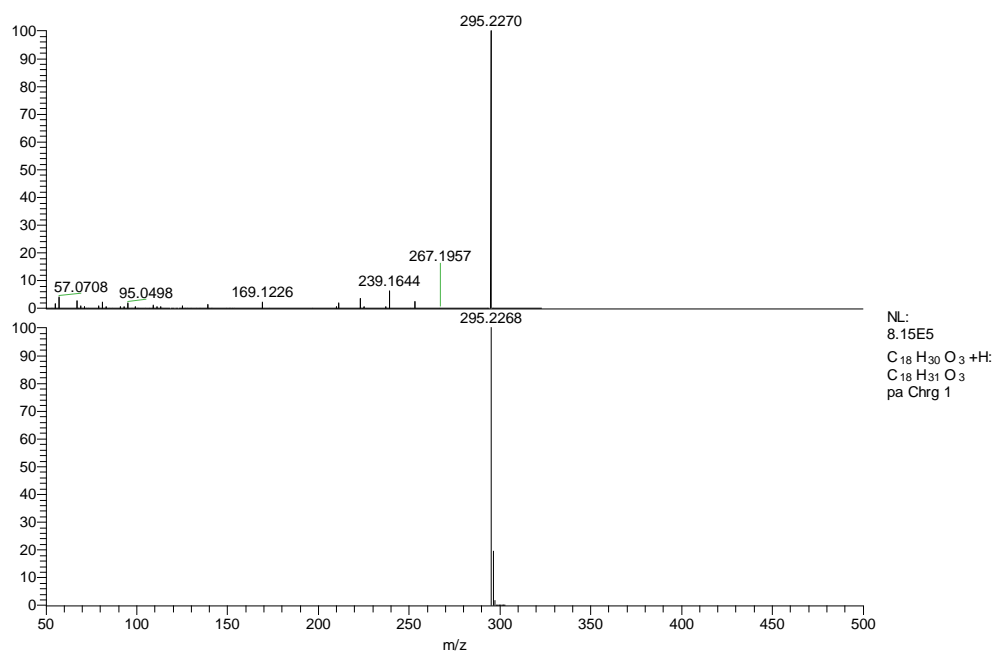

Figure S5  $^1\text{H}$ -NMR spectrum of known compound **2** ( $\text{CDCl}_3$ , 600 MHz)

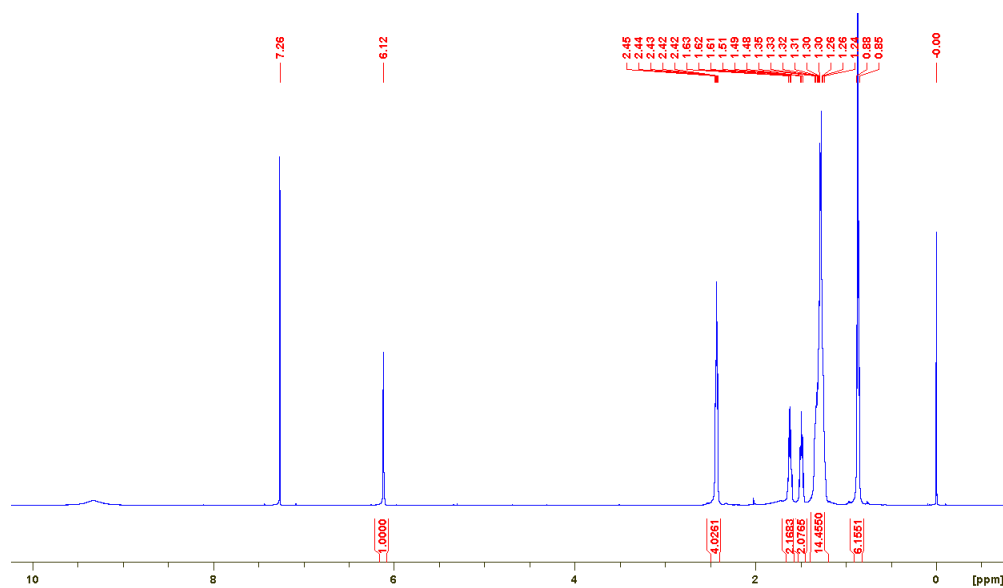

Figure S6  $^{13}\text{C}$ -NMR spectrum of known compound **2** ( $\text{CDCl}_3$ , 150 MHz)

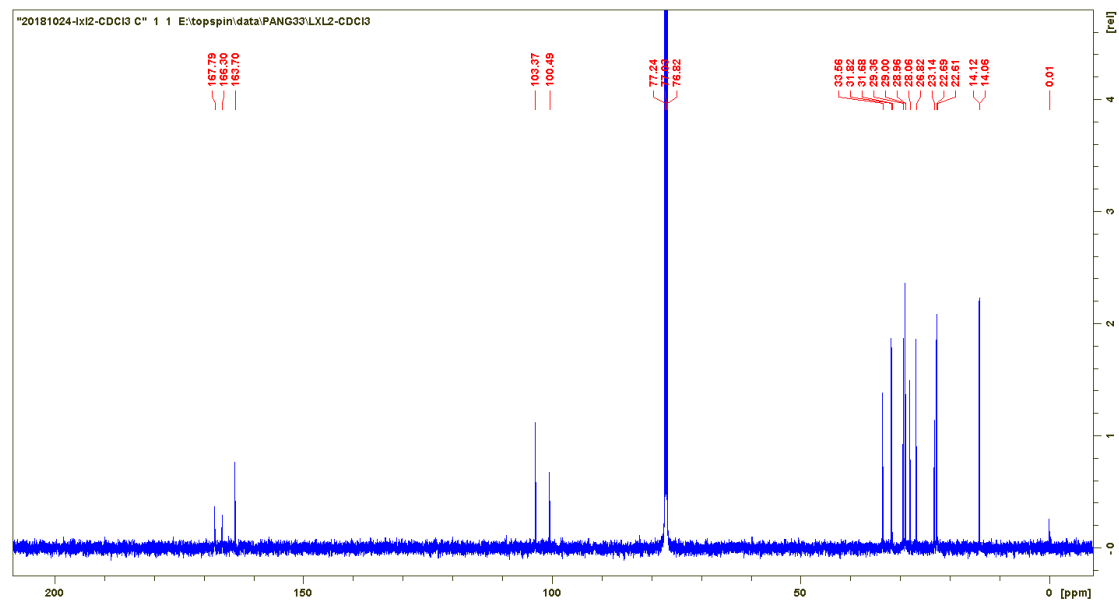

Figure S7 HRESIMS spectrum of known compound **3**

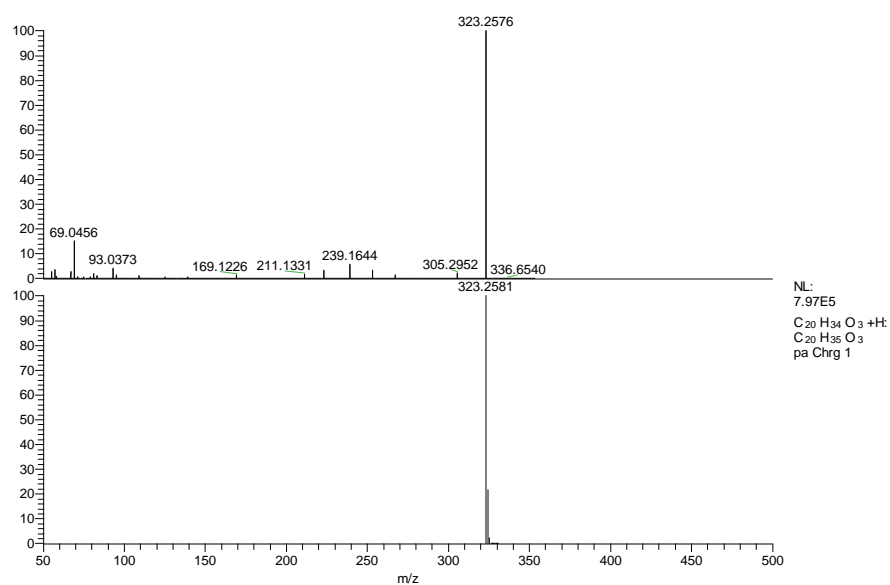

Figure S8 <sup>1</sup>H-NMR spectrum of known compound **3** (Methanol-*d*<sub>4</sub>, 600 MHz)

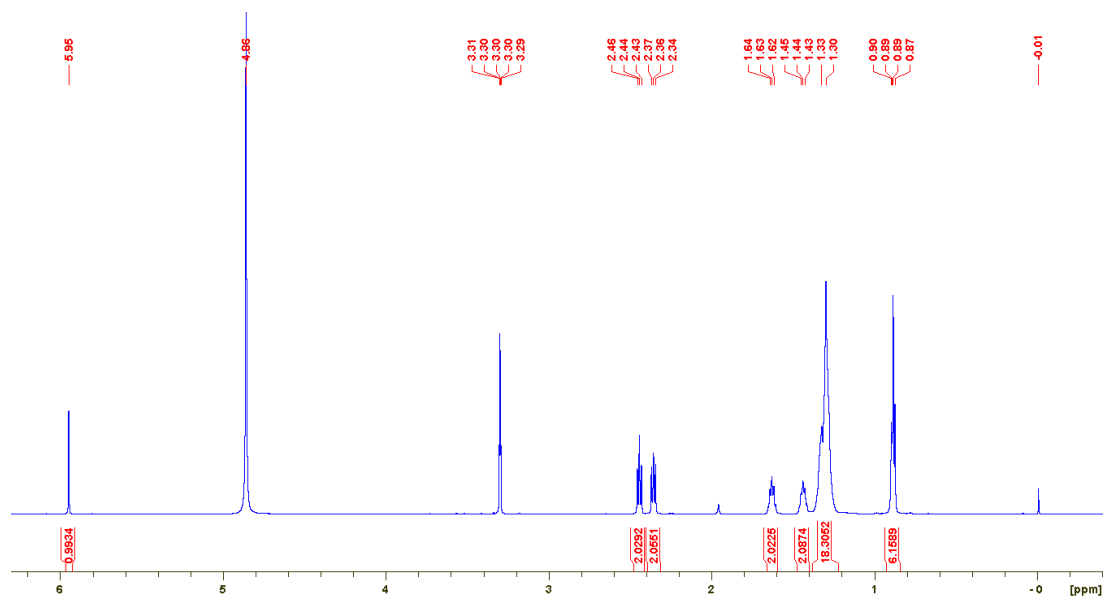



Figure S9  $^{13}\text{C}$ -NMR spectrum of known compound **3** (Methanol- $d_4$ , 150 MHz)

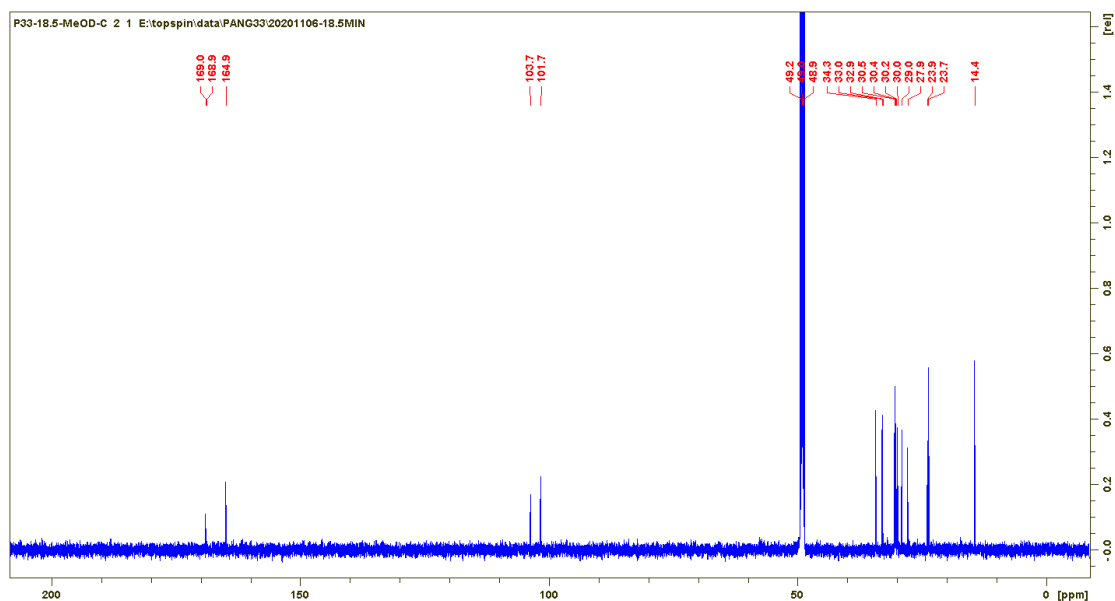

Figure S10 HRESIMS spectrum of known compound **4**

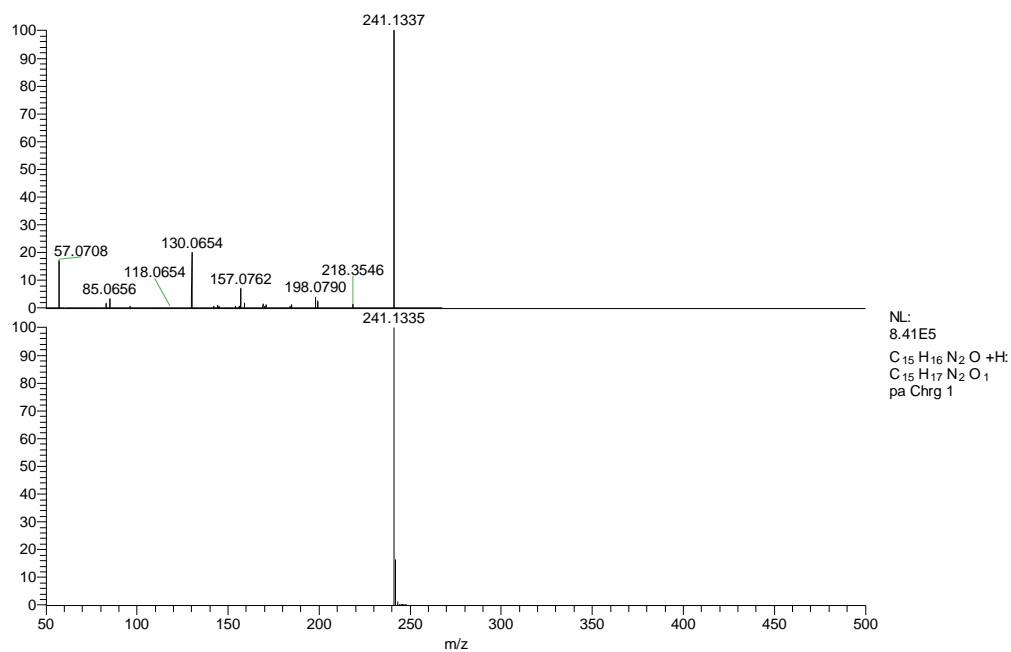

Figure S11  $^1\text{H}$ -NMR spectrum of known compound **4** (Methanol- $d_4$ , 600 MHz)

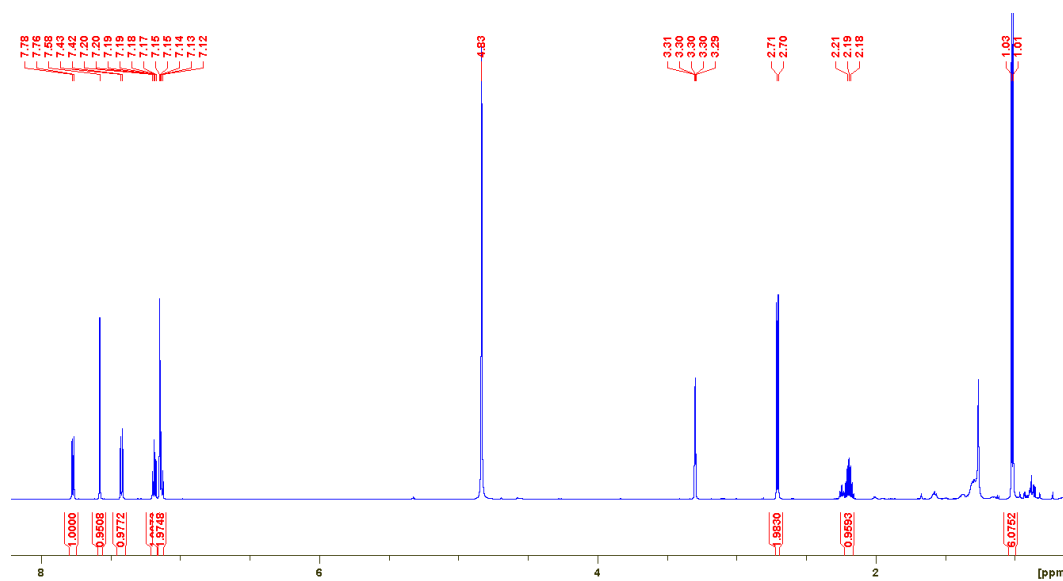

Figure S12  $^{13}\text{C}$ -NMR spectrum of known compound **4** (Methanol- $d_4$ , 150 MHz)

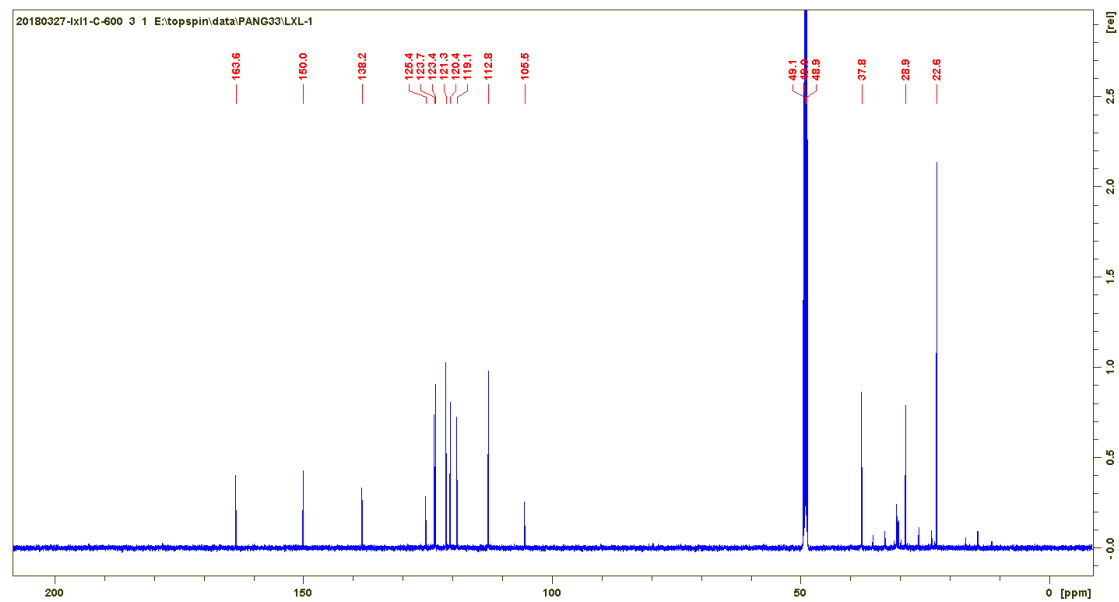

Figure S13 HRESIMS spectrum of known compound 5

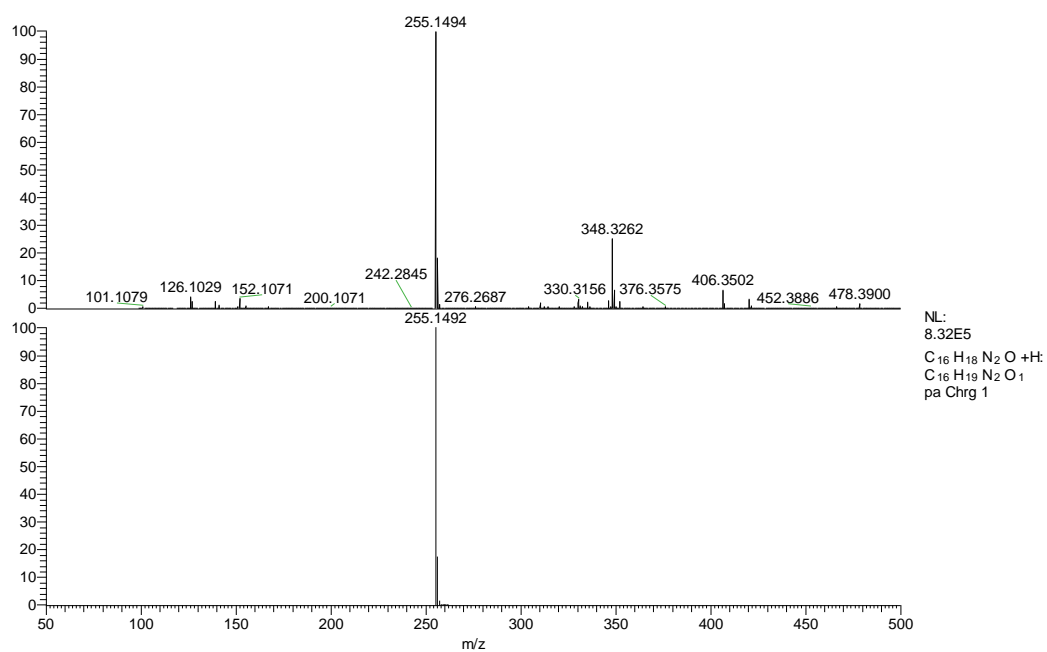

Figure S14 <sup>1</sup>H-NMR spectrum of known compound 5 (Methanol-*d*<sub>4</sub>, 600 MHz)

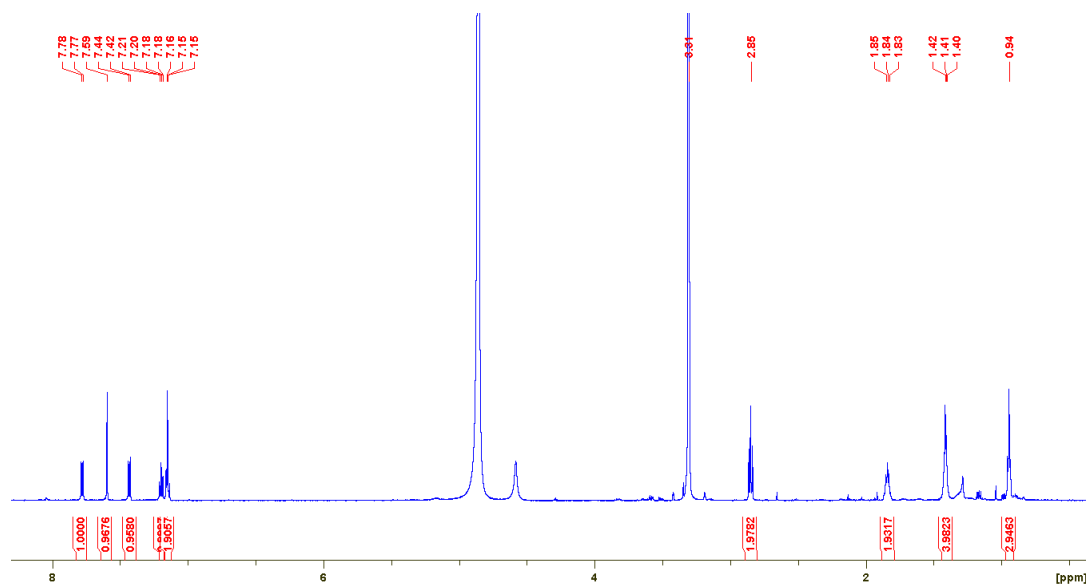

Figure S15  $^{13}\text{C}$ -NMR spectrum of known compound **5** (Methanol- $d_4$ , 150 MHz)

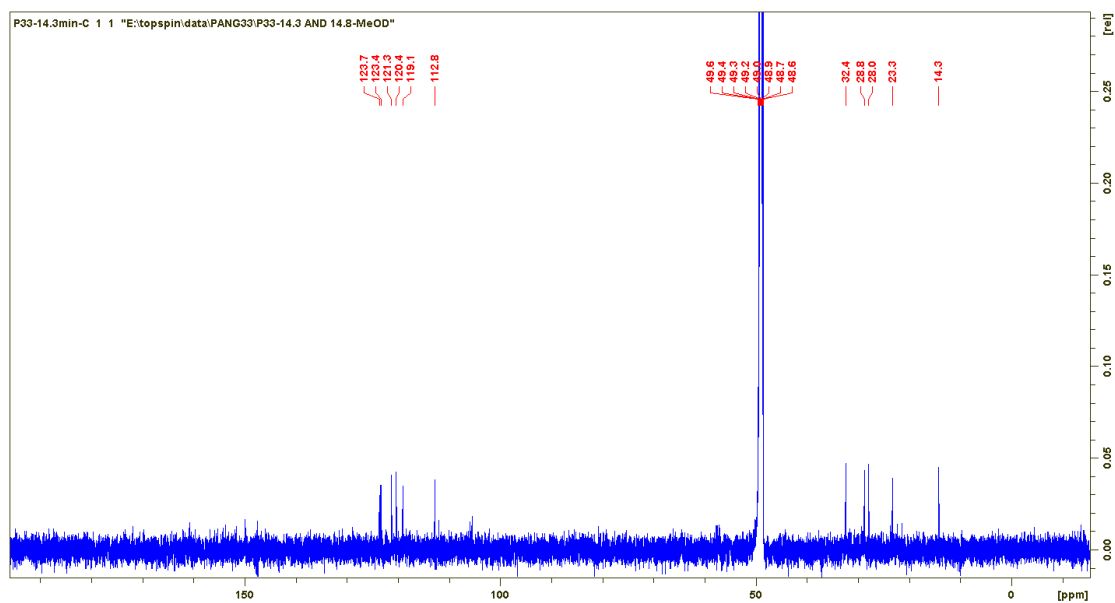

Figure S16 HRESIMS spectrum of known compound **6**

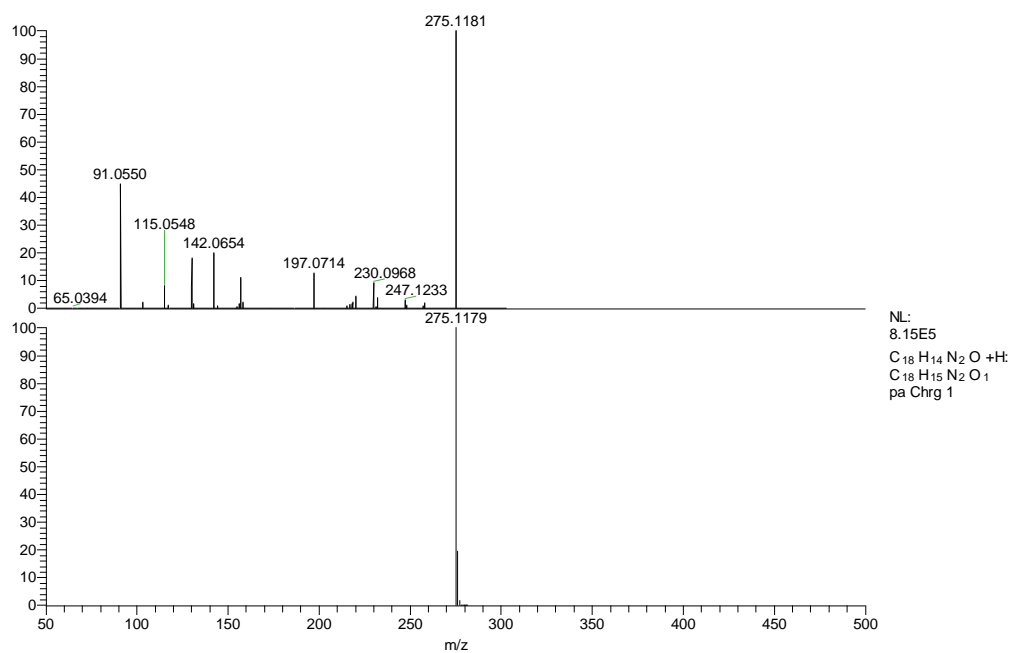

Figure S17  $^1\text{H}$ -NMR spectrum of known compound **6** ( $\text{CDCl}_3$ , 600 MHz)

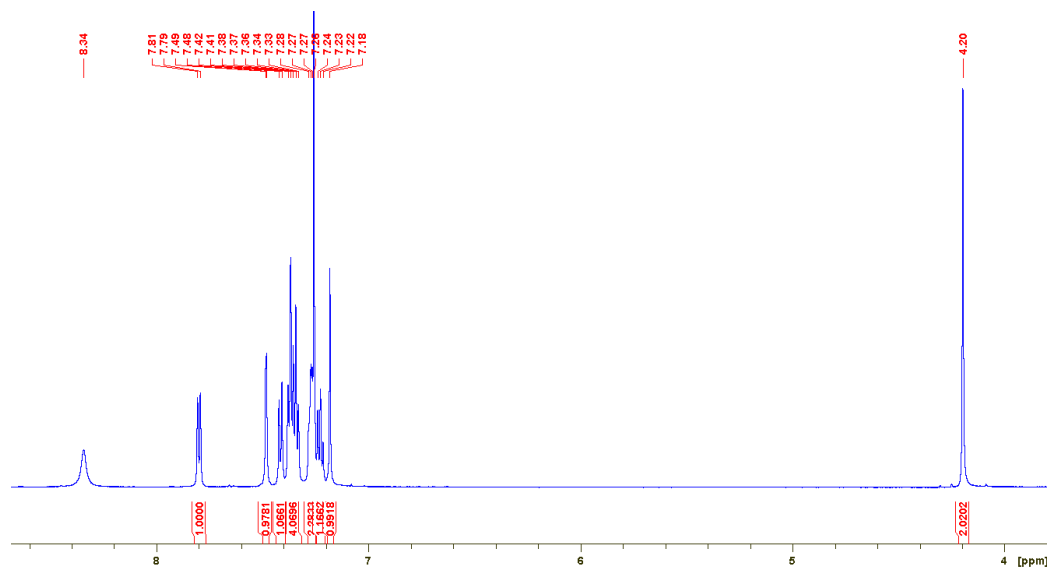

Figure S18  $^{13}\text{C}$ -NMR spectrum of known compound **6** ( $\text{CDCl}_3$ , 150 MHz)

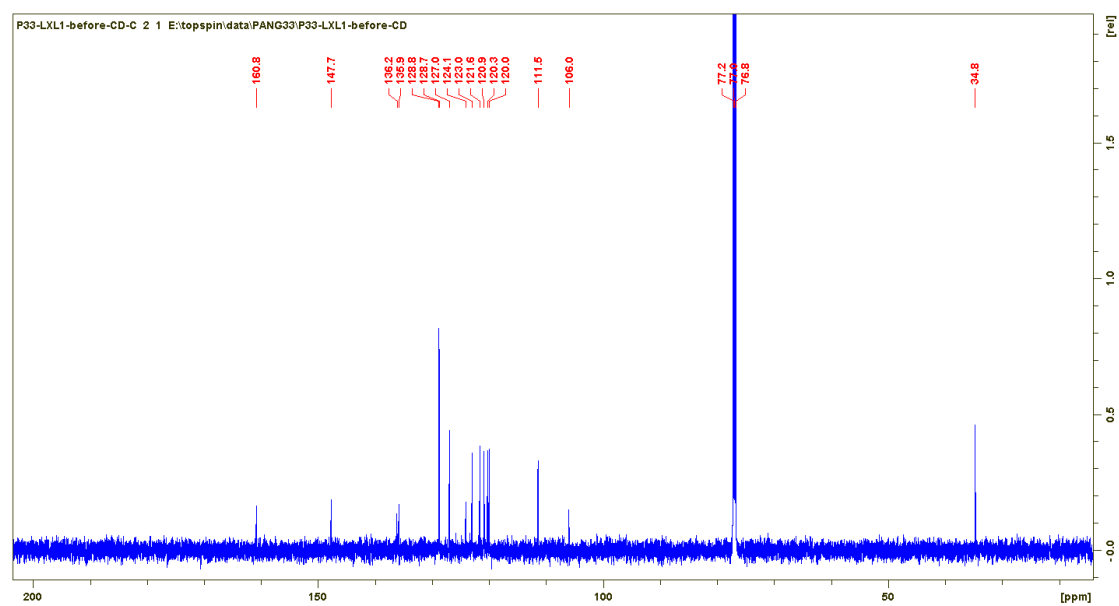

Figure S19 Antimicrobial assay of methanolic extract of *P. mosselii* P33

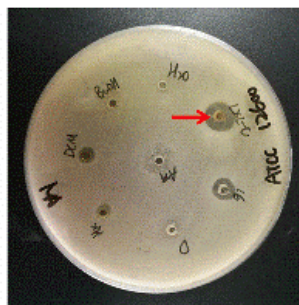

*Staphylococcus aureus*

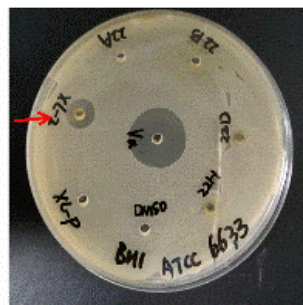

*Bacillus subtilis subsp. spizizenii*

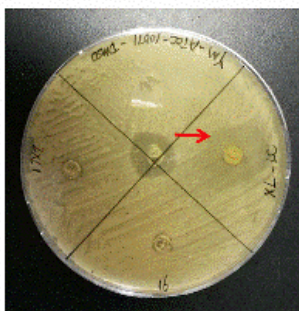

*Candida rugosa*

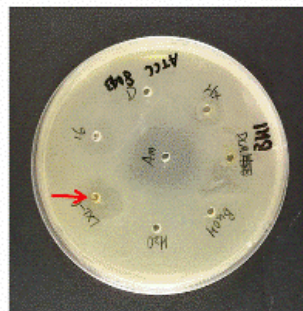

*Enterococcus hirae*

Figure S20 Phylogenetic tree of *P. mosselii* P33

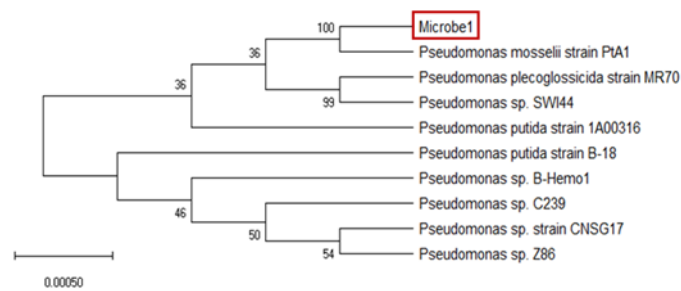

16S rDNA sequence of P33 was obtained as follows:

```
CCGTGGTAACCGTCCCCCGAAGGTTAGACTAGCTACTTCTGGTGCAACCCACTCCCA
TGGTGTGACGGGCGGTGTGTACAAGGCCCGGAACGTATTCACCGCAACATTCTGATT
TGCGATTACTAGCGATTCCGACTTCACGCAGTCGAGTTGCAGACTGCGATCCGGACTA
CGATCGGTTTTGTGAGATTAGCTCCACCTCGCGGCTTGGCAACCCTCTGTACCGACCAT
TGTAGCACGTGTGTAGCCCAGGCCGTAAGGGCCATGATGACTTGACGTCATCCCCACC
TTCTCCGGTTTGTACCGGCAGTCTCCTTAGAGTGCCACCATAACGTGCTGGTAACT
AAGGACAAGGGTTGCGCTCGTTACGGGACTTAACCCAACATCTCACGACACGAGCTG
ACGACAGCCATGCAGCACCTGTGTACAGAGTTCCCGAAGGCACCAATCCATCTCTGGA
AAGTTCTCTGCATGTCAAGGCCTGGTAAGGTTCTTCGCGTTGCTTCGAATTAAACCACA
TGCTCCACCGCTTGTGCGGGCCCCCGTCAATTCATTTGAGTTTTAACCTTGCGGCCGTA
CTCCCCAGGCGGTCAACTTAATGCGTTAGCTGCGCCACTAAAATCTCAAGGATTCCAA
CGGCTAGTTGACATCGTTTACGGCGTGGACTACCAGGGTATCTAATCCTGTTTGCTCCC
CACGCTTTCGCACCTCAGTGTCAGTATCAGTCCAGGTGGTCGCCTTCGCCACTGGTGTT
CCTTCCTATATCTACGCATTTACCGCTACACAGGAAATTCCACCACCCTCTACCATAC
TCTAGCTCGCCAGTTTGGATGCAGTTCACAGGTTGAGCCCGGGGCTTTCACATCCAA
CTTAACGAACCACCTACGCGCGCTTACGCCCAGTAATTCCGATTAACGCTTGCACCCT
CTGTATTACCGCGGTGCTGGCACAGAGTTAGCCGGTGCTTATTCTGTGCGTAACGTCA
AAACAGCAAGGTATTAGCTTACTGCCCTTCCTCCCAACTTAAAGTGCTTTACAATCCGA
AGACCTTCTTCACACACGCGGCATGGCTGGATCAGGCTTTCGCCCATTGTCCAATATTC
CCCACTGCTGCCTCCCGTAGGAGTCTGGACCGTGTCTCAGTTCCAGTGTGACTGATCAT
CCTCTCAGACCAGTTACGGATCGTCGCCTAGGTGAGCCATTACCTCACCTACTAGCTAA
TCCGACCTAGGCTCATCTGATAGCGCAAGGCCCGAAGGTCCCCTGCTTTCTCCCGTAG
GACGTATGCGGTATTAGCGTTCCTTTTCGAAACGTTGTCCCCCACTACCAGGCAGATTCC
TAGGCATTACTACCCGTCCGCCGCTGAATCAAGGAGCAA
```
